# Supplementary material for: The Neuroprotective Effects of Spray-Dried Porcine Plasma Supplementation Involve the Microbiota−Gut−Brain Axis
Source: MDPI journal article supplement (doi:10.3390/nu14112211), 2022-05-26
Supplement: s1 [file s1]

**Supplementary Table S1.** Primers used for Real-Time PCR.

| <b>Primer</b>                  | <b>Forward (5'-3')</b>   | <b>Reverse (5'-3')</b>   | <b>Size (bp)</b> |
|--------------------------------|--------------------------|--------------------------|------------------|
| <i>Cd14</i>                    | TCGCTCAACTTTTCCTGCCGA    | ATCAGTCCTCTCTCGCCCAA     | 95               |
| <i>Cd25</i>                    | TGGCAACACAGATGGAGGAA     | CGTTAGGTGAATGCTTGGCG     | 124              |
| <i>F4/80</i>                   | AACATGCAACCTGCCACAAC     | TTCACAGGATTTCGTCCAGGC    | 110              |
| <i>Ffar2</i>                   | TAGCTCCCCGGTTTTGGTAG     | AGTCTGGGGTCATTCTCCTTG    | 96               |
| <i>Ffar3</i>                   | CCAGTTGTCCAATACTCTGCATC  | CACGAGGAACACCAACAGGTA    | 99               |
| <i>Hprt1</i>                   | TGGATACAGGCCAGACTTTGTT   | TGGATACAGGCCAGACTTTGTT   | 163              |
| <i>Il-1<math>\beta</math></i>  | GGTCAAAGGTTTGGAAGCAG     | TGTGAAATGCCACCTTTTGA     | 94               |
| <i>Il-10</i>                   | GGCGCTGTCATCGATTTCTCCCC  | TGGCCTTGTAGACACCTTGGTCTT | 102              |
| <i>Il-6</i>                    | TGTGAAATGCCACCTTTTGA     | GGTCAAAGGTTTGGAAGCAG     | 109              |
| <i>Itgae</i>                   | TGACAAAGACTCAGGACCACAC   | ATAGCACAGACCACTGAATGCC   | 106              |
| <i>Muc2</i>                    | TGCTGCTGACGAGTGGTTGGTG   | CGGACGCTTGGTGGTGAGGC     | 76               |
| <i>Myd88</i>                   | TGCCAGCGAGCTAATTGAGAA    | TGCCAGCGAGCTAATTGAGAA    | 130              |
| <i>Tff3</i>                    | GCCCTCTGGCTAATGCTGTT     | CTTGAGACAGGACGCCAACGTA   | 80               |
| <i>Tgf-<math>\beta</math></i>  | CAGGGTGAAGGGGAAAACCTC    | AGTTCGGTCATTAGTCTCGC     | 204              |
| <i>Tlr2</i>                    | GTTTCTGAGTGTAGGGGCTTCA   | CATCCTCTGAGATTTGACGCTTTG | 122              |
| <i>Tlr4</i>                    | GCTTGAATCCCTGCATAGAGGTAG | GAAGAAGGAATGTCATCAGGGACT | 91               |
| <i>Tnf-<math>\alpha</math></i> | CCACCACGCTCTTCTGTCTAC    | AGGGTCTGGGCCATAGAACT     | 103              |
| <i>Trif</i>                    | TAACACACCGCTGGACACTC     | ACTGATGGAGGCCAGCTTA      | 85               |

Cd, cluster of differentiation; Ffar2, free fatty acid receptor 2 (GPR43); Ffar3, free fatty acid receptor 3 (GPR41); Hprt1, hypoxanthine phosphoribosyl transferase 1; Itgae, integrin alpha e; Il, interleukin; Muc2, mucin 2; Myd88, myeloid differentiation factor 88; Tff3, trefoil factor 3; Tgf- $\beta$ , transforming growth factor-beta; Tlr, toll-like receptor; Tnf- $\alpha$ , tumor necrosis factor alpha; Trif, toll-like receptor adaptor molecule 1.
